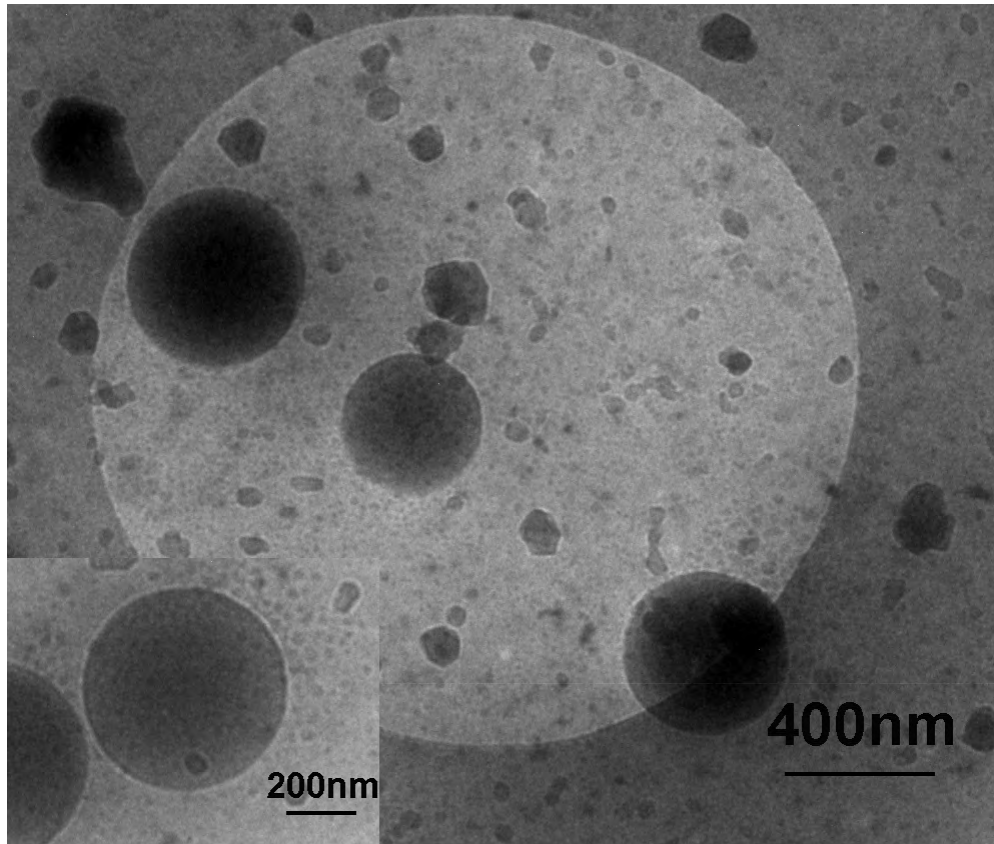

Fig. S1. Cryo TEM images of PLGA particles. Scale bars: 400nm (inset 200nm).

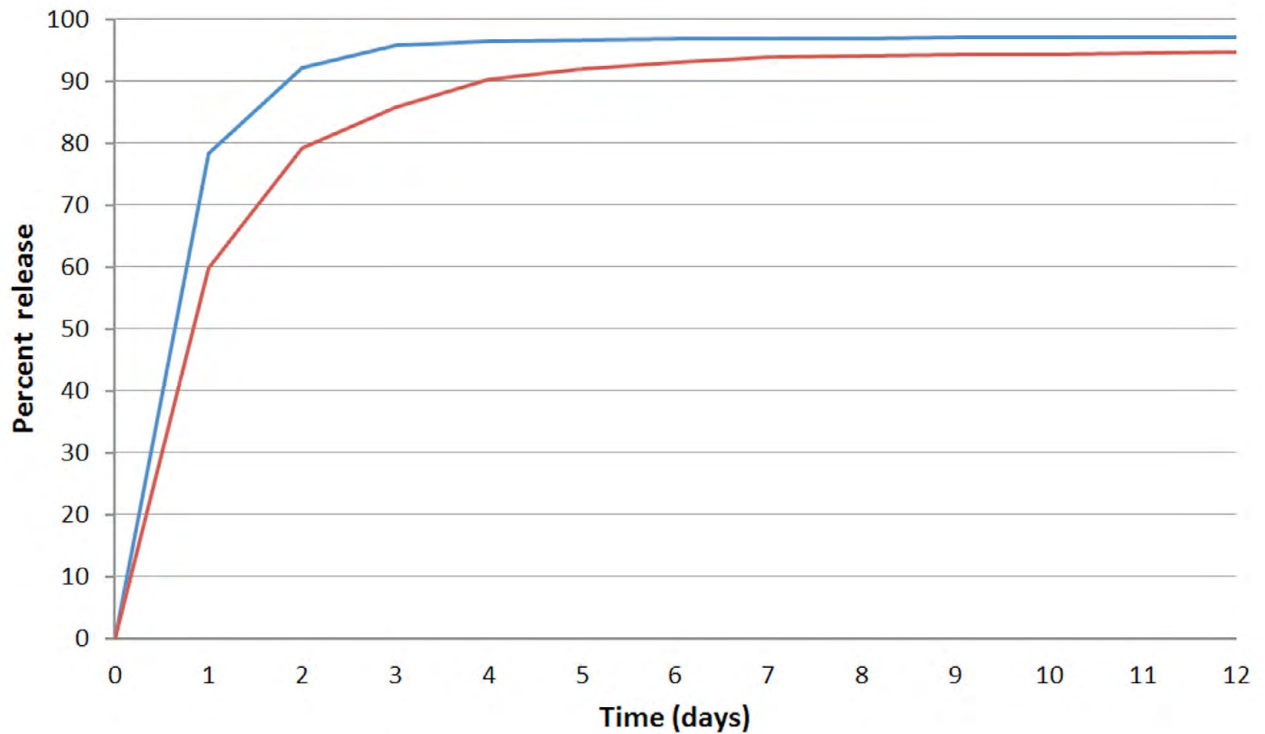

Fig. S2. *In vitro* release of rifampicin from PLGA NPs incubated at 37°C in HEPES buffer pH 7.4 (blue line) or acetate buffer pH 4 (red line). Rifampicin concentration was determined by spectrophotometry at 475nm.

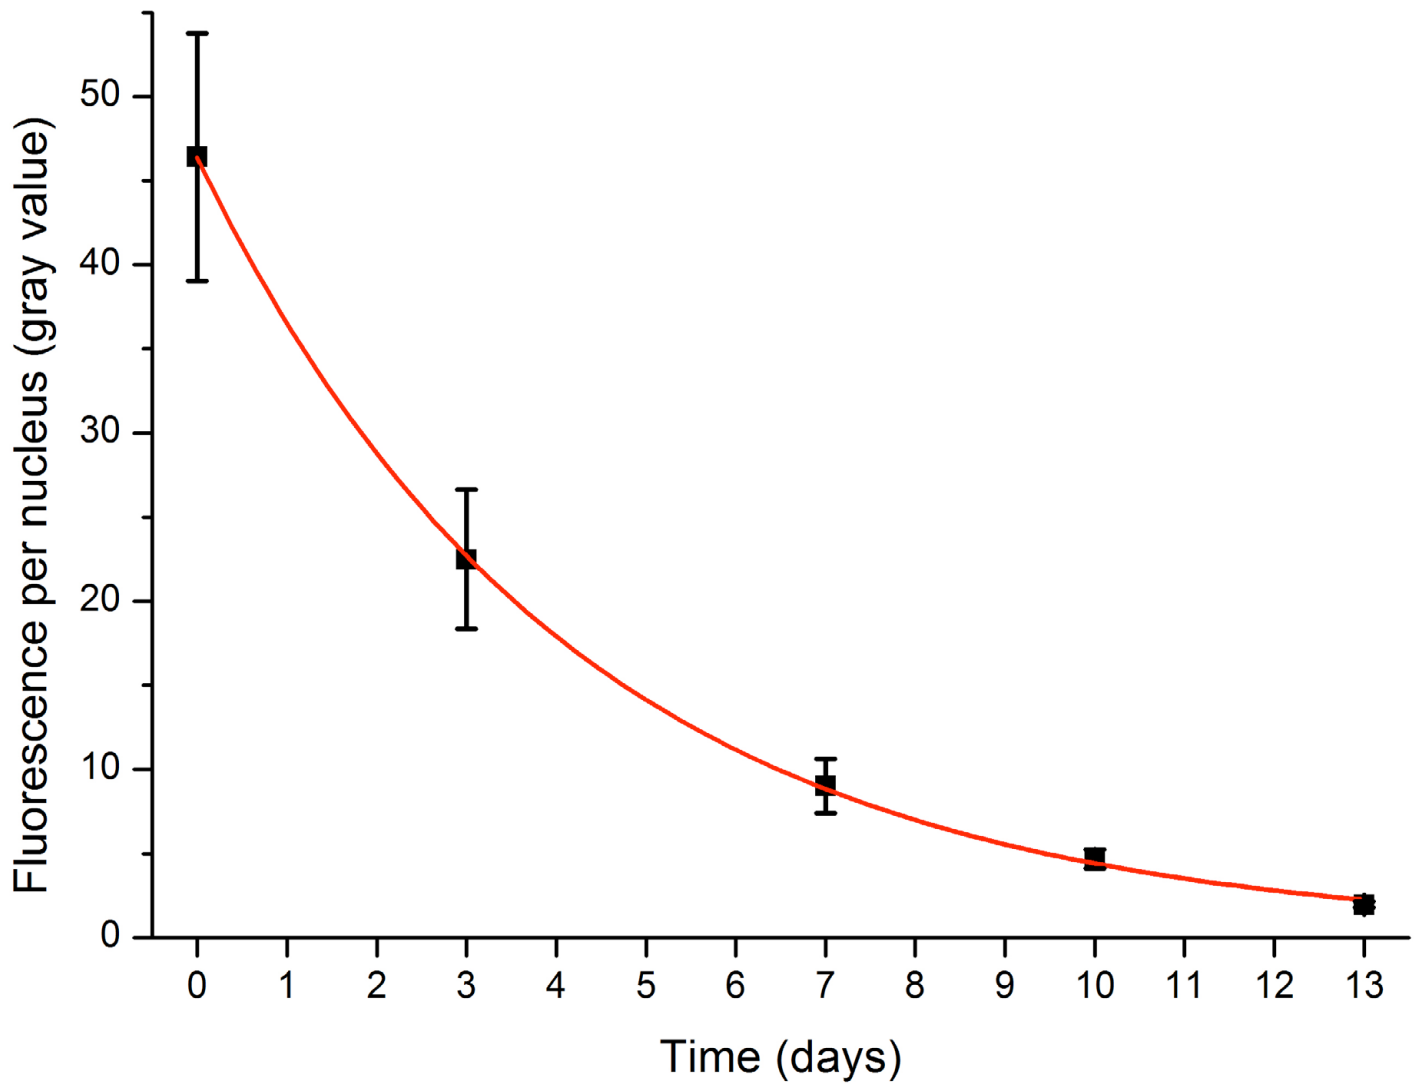

**Fig. S3. Decay of cytoplasmic coumarin-6 in cells.** To determine how rapidly coumarin-6 was released from the cytoplasm, we quantified its cytoplasmic intensity over time. For each time point we determined the average gray value of 10 cytoplasmic regions where no NPs were present. The graph shows the average gray value and the error bar is the standard deviation of these measurements. The red line is the exponential decay fit ( $\text{Fluorescence} = A1 \cdot \exp(-\text{time}/\text{lifetime}) + y0$ ), with  $A1$  fixed to the day 0 intensity). The lifetime from the fit is 6.3 days.
